# Supplementary material for: Comparison of the Intestinal Bacterial Communities between Captive and Semi-Free-Range Red-Crowned Cranes (Grus japonensis) before Reintroduction in Zhalong National Nature Reserve, China
Source: MDPI journal article supplement (doi:10.3390/ani14010003), 2023-12-19
Supplement: s1 [file s1]

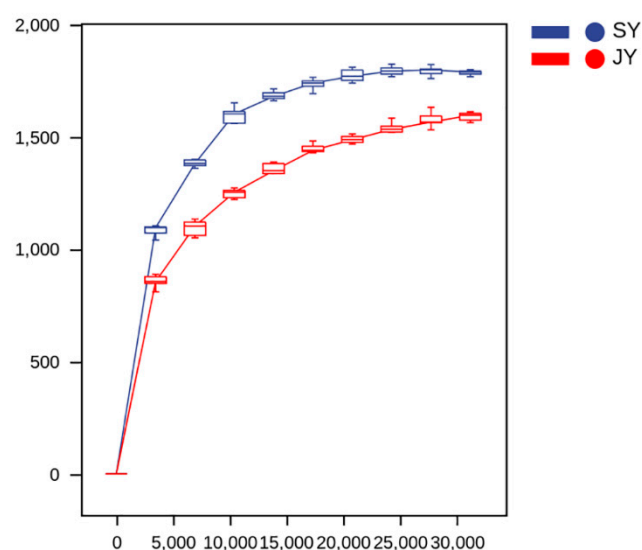

Fig. S1 Rarefaction curves of intestinal bacteria of semi-free-range and captive red-crowned cranes.

Note: SY, Red-crowned cranes in semi-free-range, JY, Red-crowned cranes in captivity.

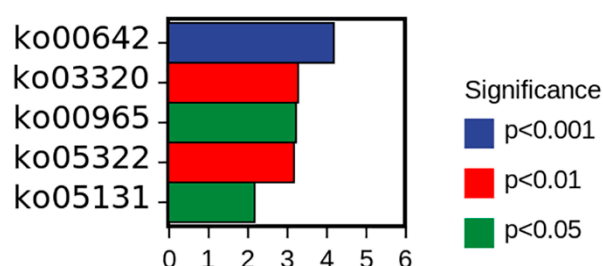

Fig. S2 Analysis of metabolic pathway differences between semi-free-range and captive red-crowned cranes based on the third KEGG classification level.

Note: The positive value of  $\log_{FC}(\log_2(\text{fold change}))$  on the horizontal axis represents up-regulation in the upregulated group compared with the control group, while the negative value represents down-regulation. The vertical coordinates are different Pathway tags; Show the degree of significance in different colors. Upregulation group: SY, semi free-range red-crowned cranes, control group: JY, captive red-crowned cranes.

Table S1. Relative abundances of the dominant bacteria at the phylum level in semi-free-range and captive red-crowned cranes.

| Phylum         | Semi-free-range | Captive |
|----------------|-----------------|---------|
| Proteobacteria | 63.51%          | 80.51%  |
| Firmicutes     | 36.09%          | 19.28%  |
| Actinobacteria | 0.16%           | 0.09%   |
| Bacteroidetes  | 0.02%           | 0.02%   |
| Cyanobacteria  | 0.00%           | 0.01%   |
| Fusobacteria   | 0.00%           | 0.01%   |
| Chloroflexi    | 0.00%           | 0.00%   |

|                  |       |       |
|------------------|-------|-------|
| Tenericutes      | 0.00% | 0.00% |
| Verrucomicrobia  | 0.00% | 0.00% |
| Gemmatimonadetes | 0.00% | 0.00% |
| Others           | 0.21% | 0.08% |

Table S2. Relative abundances of the dominant bacteria at the genus level in semi-free-range and captive red-crowned cranes.

| Genus                        | Semi-free-range | Captive |
|------------------------------|-----------------|---------|
| Psychrobacter                | 45.61%          | 19.08%  |
| Pseudomonadaceae_Pseudomonas | 7.70%           | 22.09%  |
| Lactobacillus                | 0.46%           | 14.76%  |
| Sporosarcina                 | 10.99%          | 0.01%   |
| Acinetobacter                | 4.42%           | 5.60%   |
| Brochothrix                  | 8.12%           | 0.71%   |
| Carnobacterium               | 2.47%           | 0.76%   |
| Lactococcus                  | 3.05%           | 0.08%   |
| Pantoea                      | 0.00%           | 2.79%   |
| Hafnia                       | 0.00%           | 1.50%   |
| Others                       | 17.18%          | 32.62%  |

Table S1 One-way ANOVA of the relative abundance of metabolic pathways based on the second KEGG classification level in semi-free-range and captive red-crowned cranes intestinal bacteria.

|                                          | Feeding patterns (mean $\pm$ standard deviation) |                                | <i>F</i> | <i>p</i> |
|------------------------------------------|--------------------------------------------------|--------------------------------|----------|----------|
|                                          | captive ( <i>n</i> =8)                           | semi-free-range ( <i>n</i> =8) |          |          |
| Cell growth and death                    | 476.19 $\pm$ 44.16                               | 425.57 $\pm$ 82.12             | 2.358    | 0.147    |
| Cell motility                            | 665.14 $\pm$ 339.80                              | 923.26 $\pm$ 413.24            | 1.862    | 0.194    |
| Cellular community - eukaryotes          | 0.00 $\pm$ 0.00                                  | 0.00 $\pm$ 0.00                | null     | null     |
| Cellular community - prokaryotes         | 66.23 $\pm$ 26.48                                | 113.99 $\pm$ 21.79             | 15.520   | 0.001**  |
| Transport and catabolism                 | 154.27 $\pm$ 30.87                               | 117.91 $\pm$ 29.06             | 5.886    | 0.029*   |
| Membrane transport                       | 882.71 $\pm$ 131.50                              | 911.05 $\pm$ 74.92             | 0.280    | 0.605    |
| Signal transduction                      | 207.73 $\pm$ 38.37                               | 238.58 $\pm$ 58.56             | 1.553    | 0.233    |
| Signaling molecules and interaction      | 0.00 $\pm$ 0.00                                  | 0.07 $\pm$ 0.13                | 2.196    | 0.161    |
| Folding, sorting and degradation         | 1261.35 $\pm$ 141.29                             | 1091.58 $\pm$ 145.67           | 5.598    | 0.033*   |
| Replication and repair                   | 1917.30 $\pm$ 219.06                             | 1672.84 $\pm$ 440.10           | 1.978    | 0.181    |
| Transcription                            | 245.34 $\pm$ 42.31                               | 219.30 $\pm$ 29.04             | 2.059    | 0.173    |
| Translation                              | 1065.18 $\pm$ 174.77                             | 887.29 $\pm$ 319.00            | 1.914    | 0.188    |
| Metabolism of terpenoids and polyketides | 2552.34 $\pm$ 299.13                             | 2702.97 $\pm$ 108.20           | 1.794    | 0.202    |
| Nucleotide metabolism                    | 643.98 $\pm$ 86.19                               | 576.45 $\pm$ 167.54            | 1.027    | 0.328    |

|                                             |                |                |        |         |
|---------------------------------------------|----------------|----------------|--------|---------|
| Xenobiotics biodegradation and metabolism   | 2118.51±592.62 | 2523.95±256.20 | 3.155  | 0.097   |
| Digestive system                            | 0.01±0.01      | 0.08±0.11      | 2.750  | 0.119   |
| Endocrine system                            | 30.32±35.53    | 87.43±47.37    | 7.442  | 0.016*  |
| Environmental adaptation                    | 68.09±6.39     | 64.64±5.24     | 1.400  | 0.256   |
| Immune system                               | 4.60±8.83      | 2.25±6.35      | 0.376  | 0.550   |
| Cancers                                     | 1.55±4.39      | 0.00±0.00      | 1.000  | 0.334   |
| Cardiovascular diseases                     | 0.01±0.01      | 0.20±0.17      | 10.397 | 0.006** |
| Immune diseases                             | 0.00±0.00      | 0.03±0.05      | 2.644  | 0.126   |
| Infectious diseases                         | 78.19±31.01    | 87.83±23.40    | 0.493  | 0.494   |
| Neurodegenerative diseases                  | 2.93±8.28      | 4.49±12.69     | 0.085  | 0.775   |
| Amino acid metabolism                       | 5074.07±240.78 | 4381.37±506.46 | 12.207 | 0.004** |
| Biosynthesis of other secondary metabolites | 475.17±69.46   | 597.57±57.07   | 14.830 | 0.002** |
| Carbohydrate metabolism                     | 4816.11±487.83 | 4339.79±407.82 | 4.490  | 0.052   |
| Energy metabolism                           | 1808.56±194.49 | 1745.41±116.09 | 0.622  | 0.444   |
| Glycan biosynthesis and metabolism          | 946.33±140.65  | 943.99±76.20   | 0.002  | 0.968   |
| Lipid metabolism                            | 3021.38±253.91 | 2729.95±429.37 | 2.731  | 0.121   |
| Metabolism of cofactors and vitamins        | 4666.45±437.09 | 4201.01±483.23 | 4.082  | 0.063   |
| Metabolism of other amino acids             | 3029.60±201.67 | 2719.14±347.08 | 4.785  | 0.046*  |
| * $p < 0.05$ ** $p < 0.01$                  |                |                |        |         |
